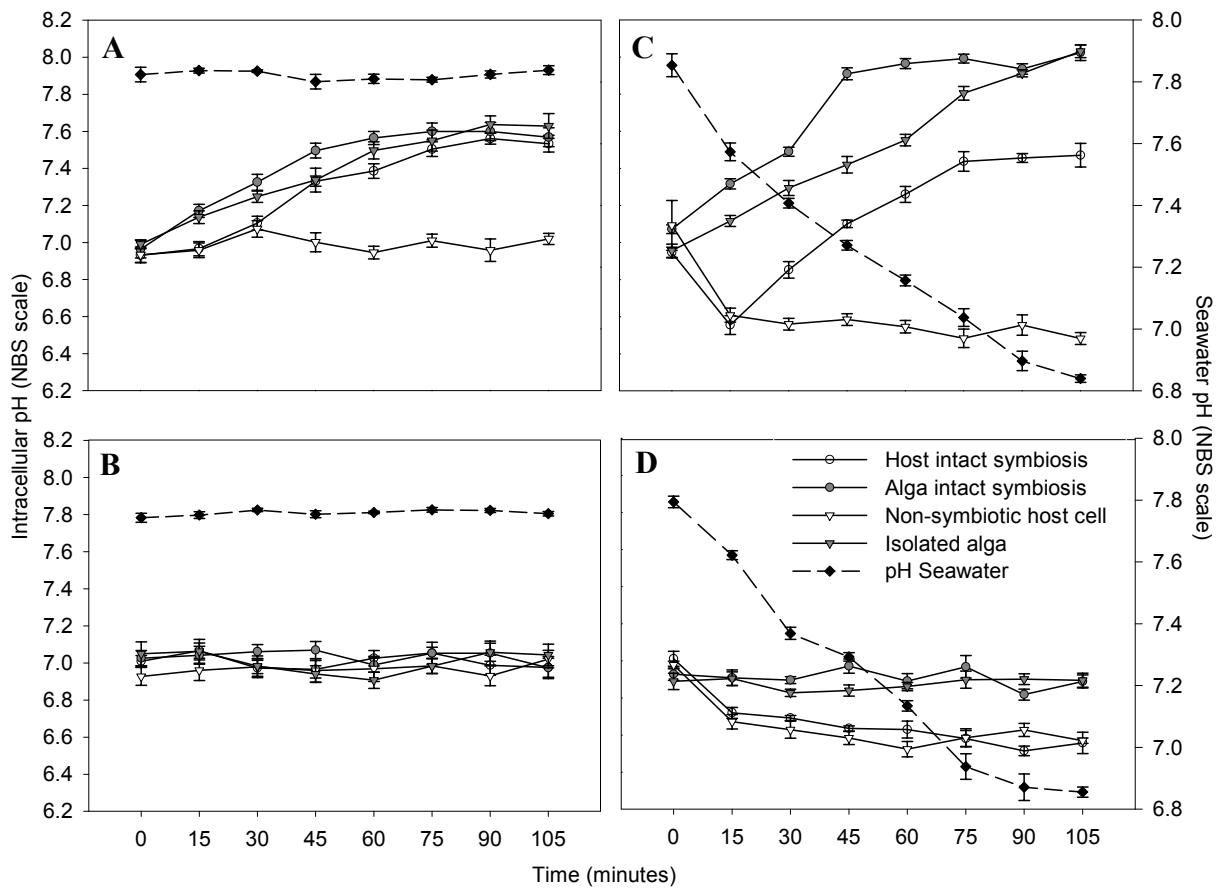

**Fig. S1.** Absolute change in the intracellular pH ( $pH_i$ ) of four cell types isolated from the coral *Pocillopora damicornis* (*Symbiodinium* freshly isolated from host coral cell; isolated non-symbiotic host coral cell; isolated host coral cell and its symbiotic algae). These cells were incubated under control (A,B) and  $CO_2$  acidified conditions (C,D) under two treatments: (top) in the light without the photosynthetic inhibitor DCMU; and (bottom) under light in the presence of DCMU. At each time point, the  $pH_i$  (NBS scale) of each cell was measured using confocal microscopy ( $N=5$ ) and the  $pH_e$  (NBS scale) of the surrounding seawater media was measured via the spectrophotometric m-cresol dye method ( $N=5$ ). Values plotted represent mean  $\pm$  s.e.m. The dashed line represents the external pH ( $pH_e$ ) of the surrounding seawater and is plotted on the secondary y-axis.

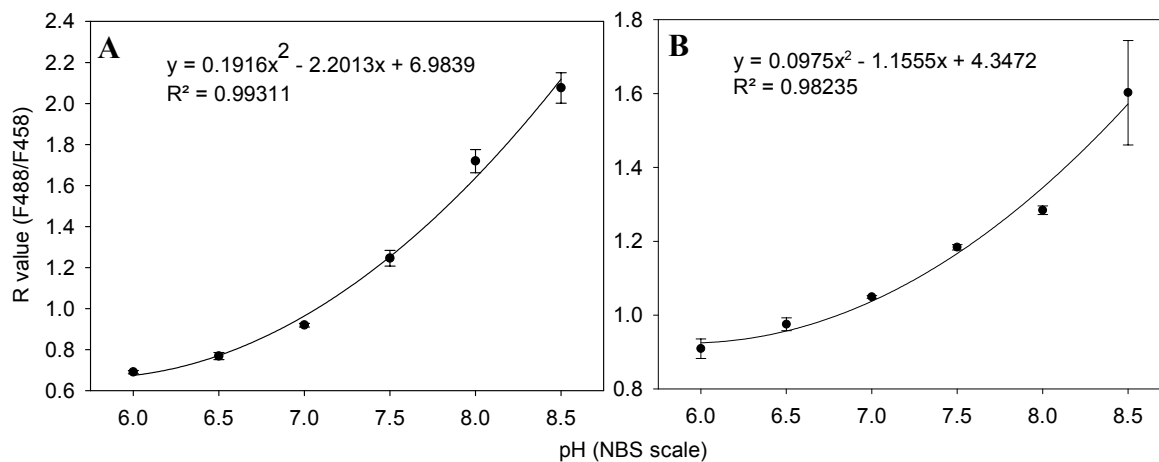

**Fig. S2.** Calibration of intracellular pH ( $pH_i$ ) in (A) host coral cell and (B) *Symbiodinium* cells isolated from the coral *Pocillopora damicornis* using the fluorescent dye BCECF-AM ester.  $pH_i$  was calculated from the ratio of fluorescence emission,  $R$  ( $F_{488}/F_{458}$ ).  $R$  was then linked to  $pH_i$  by the following logarithmic equation:  $pH = pK_a + \log \{ [(R - R_A)/(R_B - R)] \times (F_{A458}/F_{B458}) \}$ , where  $pK_a$  represents the acid dissociation constant and A and B represent the acidic and basic end points of the titration (in this case, 6 and 8.5).

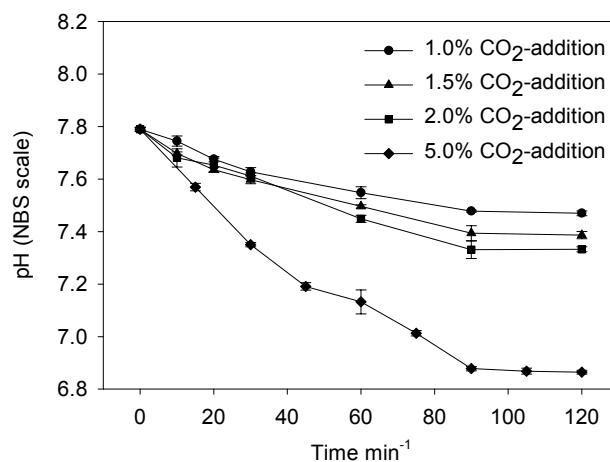

**Fig. S3.** Stability of the live-cell CO<sub>2</sub> incubator after different levels of CO<sub>2</sub> addition. pH (NBS scale) was calculated using a spectrophotometer following the m-cresol dye method, stipulated in SOP 6B (Dickson et al., 2007).
